1 **Title**

2 Poly(A) binding protein is required for mRNP remodeling to form P-bodies in  
3 mammalian cells

4  
5 **Running title**

6 Poly(A) binding protein and P-body formation

7  
8 Jingwei Xie<sup>1</sup>, Yu Chen<sup>1</sup>, Xiaoyu Wei<sup>1</sup>, Guennadi Kozlov<sup>1</sup>, Kalle Gehring<sup>1,2</sup>

9 <sup>1</sup> Department of Biochemistry and Groupe de Recherche Axé sur la Structure des  
10 Protéines, McGill University, Montreal, Quebec H3G 0B1, Canada

11 <sup>2</sup> To whom correspondence should be addressed: Dept. of Biochemistry, McGill  
12 University, 3649 Promenade Sir William Osler, Rm. 473, Montreal, QC H3G 0B1,  
13 Canada. Tel.: 514-398-7287; Fax: 514-398-2983; E-mail: kalle.gehring@mcgill.ca.

14  
15 **Keywords**

16 PABPC1, P-bodies, stress granules, mRNP remodeling, GW182

17  
18 **Summary statement**

19 A novel role of poly(A) binding protein is reported in P-body formation

20  
21 **Abstract**

22 Compartmentalization of mRNA through formation of RNA granules is involved in many  
23 cellular processes, yet it is not well understood. mRNP complexes undergo dramatic  
24 changes in protein compositions, reflected by markers of P-bodies and stress granules.  
25 Here, we show that PABPC1, albeit absent in P-bodies, plays important role in P-body  
26 formation. Depletion of PABPC1 decreases P-body population in unstressed cells. Upon  
27 stress in PABPC1 depleted cells, individual P-bodies fail to form and instead P-body  
28 proteins assemble on PABPC1-containing stress granules. We hypothesize that mRNP  
29 recruit proteins via PABPC1 to assemble P-bodies, before PABPC1 is displaced from  
30 mRNP. Further, we demonstrate that GW182 can mediate P-body assembly. These  
31 findings help us understand the early stages of mRNP remodeling and P-body formation.

## 32 **Introduction**

33

34 Cytoplasmic messenger ribonucleoproteins (mRNPs) are suggested to cycle among  
35 polysomes, stress granules (SGs) and P-bodies (PBs). In this cycle, mRNAs exist in  
36 different functional states from translating, non-translating to degradation. While  
37 polysomes consist of translating mRNAs and SGs paused mRNAs with translation  
38 initiation components, PBs contain mRNA decay machineries.

39

40 PBs are present in unstressed cells, and further induced upon inhibition of translation  
41 initiation (Teixeira et al., 2005, Kedersha et al., 2005). PBs are closely related to control  
42 of translation and mRNA degradation. Proteins at PBs are involved in mRNA decay and  
43 translation repression, including decapping enzyme complex Dcp1/Dcp2; decapping  
44 activator hedls/GE-1; translation repressor and decapping activator DDX6/RCK, and the  
45 CCR4/NOT deadenylase complex (Anderson and Kedersha, 2006, Eulalio et al., 2007a).

46

47 SGs can be juxtaposed with PBs in animal cells(Kedersha et al., 2005, Stoecklin and  
48 Kedersha, 2013), which suggests that they are close in origin. SGs share some common  
49 components with PBs, but distinctively contain translation initiation factors like  
50 PABPC1, eIF4G, eIF4A, eIF3 and eIF2 etc. (Decker and Parker, 2012).

51

52 Assembly of PBs and SGs may start from non-translating mRNPs, which aggregate into  
53 microscopic granules through certain protein-protein interactions. In yeast, a self-  
54 interacting domain of Edc3 protein and prion-like glutamine/asparagine (Q/N) rich region  
55 of Lsm4 can facilitate the aggregation (Reijns et al., 2008, Decker et al., 2007). However,  
56 in metazoans, Edc3 is not required for PB assembly (Eulalio et al., 2007b). Instead,  
57 depletion of GW182 or hedls/GE-1, two proteins containing low-complexity and Q/N  
58 rich regions, leads to decreased PBs in unstressed animal cells (Eulalio et al., 2007b, Liu  
59 et al., 2005a, Yu et al., 2005, Kato et al., 2012).

60

61 One interesting issue is the absence of most translation initiation factors, including  
62 poly(A) binding protein cytoplasmic 1 (PABPC1), in P-bodies of mammalian cells.

63 Components of RNA granules are in dynamic exchange with cytoplasmic proteins  
64 (Kedersha et al., 2005, Andrei et al., 2005). The association and dissociation of proteins,  
65 such as PABPC1, to and from the cap and tail of mRNA may be an important step in the  
66 transitions of mRNAs from translating to non-translating or decay states.

67

68 mRNAs have a poly(A) tail of about 50-100 nucleotides in mammalian cells (Chang et  
69 al., 2014, Subtelny et al., 2014). PABPC1 occupies around 27-residues on the poly(A)  
70 tail and forms repeating structures (Baer and Kornberg, 1983). PABPC1 is the major  
71 isoform out of four known in mammals. PABPC1 consists of four RNA binding domains  
72 (RRM 1-4) followed by a poorly conserved linker region and a protein-protein interaction  
73 (MLLE) domain at the C-terminus. The RRM domains are pivotal for circularization of  
74 mRNA through the binding of the poly(A) tail and eIF4G (Kahvejian et al., 2005, Deo et  
75 al., 1999, Imataka et al., 1998, Safaee et al., 2012). The MLLE domain recognizes a  
76 conserved PAM2 peptide motif, found in a number of proteins including PB components  
77 GW182, Pan3 and Tob1/2 (Xie et al., 2014).

78

79 PABPC1 plays important roles in decay besides translation of mRNA. Yeast poly(A)  
80 binding protein (Pab1) can inhibit Ccr4/Pop2/Not deadenylase complex (Tucker et al.,  
81 2002), possibly due to increased association and protection of Pab1 to the poly(A) tail. It  
82 was recently shown that PABPC1 helps recruiting microRNA-induced silencing complex  
83 (miRISC) through GW182, a major component of miRISC (Moretti et al., 2012).  
84 GW182, in turn, facilitates PABPC1 dissociation from silenced mRNA without  
85 deadenylation (Zekri et al., 2013).

86

87 Although PABPC1 displacement is a critical step in mRNA decay and can act as a  
88 scaffold protein on mRNA to recruit PB proteins GW182 and Pan3 etc. through PAM2  
89 motifs, it is not known what role PABPC1 plays in assembling PBs. Here, we report that  
90 depletion of PABPC1 affects PB numbers in unstressed cells and causes fusion of PB and  
91 SG components upon cell stress. Further, we found that the availability of PABPC1, but  
92 not the presence of SG structures, is critical in PB genesis. By engineering GW182 to

93 strengthen its binding to PABPC1, we simulated the fusion of SGs and PBs. Overall, we  
94 conclude that PABPC1 serves as a platform for early mRNP remodeling to form PBs.

95

## 96 **Results**

### 97 **PABPC1 protein depletion decreases PBs in unstressed cells**

98 We were able to knock-down PABPC1 using siRNAs as previously shown (Yoshida et  
99 al., 2006). The number of PBs decreased significantly upon PABPC1 knock-down in  
100 unstressed HeLa and MEF cells (Fig. 1A). PABPC1 depletion affects bulk translation  
101 only mildly and doesn't perturb the levels of the major translation factors (Yoshida et al.,  
102 2006). However, Paip2, a PABPC1-interacting protein, decreases in cells following  
103 PABPC1 depletion (Yoshida et al., 2006). To exclude a role of Paip2 in PB formation,  
104 we knocked down both isoforms, Paip2a and Paip2b, by siRNA and found little effect on  
105 the number of PBs (Fig. 1B). It was reported that depletion of hedls or GW182 decreased  
106 PBs in cells (Eulalio et al., 2007b, Liu et al., 2005b, Yu et al., 2005). However, PABPC1  
107 depletion didn't lower hedls or GW182 protein levels (Fig. 1C), which suggests that  
108 PABPC1 is affecting PBs independently of changes in hedls or GW182.

109

### 110 **PBs cannot be re-induced in PABPC1 protein depleted cells**

111 PB population may be reduced by siRNAs unrelated to their silencing activities and PBs  
112 can often be re-induced by stress (Serman et al., 2007). Therefore, we checked whether  
113 PBs could be re-induced upon cell stress. In mammalian cells, PBs and SGs can be  
114 clearly distinguished. PBs are relatively compact and dense, while SGs are bigger, loose  
115 and more irregular (Stoecklin and Kedersha, 2013, Souquere et al., 2009, Kedersha et al.,  
116 2005). When we treated PABPC1-depleted cells with arsenite to induce PBs and SGs, we  
117 were surprised to find that compact dense PBs failed to form. Instead, the PB component  
118 hedls was relocalized to SGs (Fig. 2). The colocalization was found across the cytoplasm  
119 by 3D confocal microscopy. This suggests that PB assembly is affected by depletion of  
120 PABPC1.

121 To our knowledge, only DDX6, a RNA helicase also known as RCK/p54, can trigger  
122 PB/SG fusions and prevent PB formation when depleted (Mollet et al., 2008, Serman et  
123 al., 2007, Ayache et al., 2015). However, DDX6 protein levels remained unchanged after

124 PABPC1 depletion (Fig. 1C). Thus, PABPC1 affects PB formation independently of  
125 DDX6.

126

### 127 **SG assembly is not affected by PABPC1 depletion and is independent of PB**

#### 128 **assembly**

129 Previously, it was observed that PABPC1 depletion induced SG in a low percentage of  
130 unstressed cells (Mokas et al., 2009). We checked SG assembly in stressed cells, and  
131 found SGs marked by G3BP, HuR (Fig. 3A & B) or Ago2 were not significantly affected  
132 by PABPC1 depletion. This implies that SGs can form in the presence of low levels of  
133 PABPC1 protein.

134 The assembly of PBs and SGs are independent processes (Kedersha et al., 2005). PBs  
135 exist in unstressed cells in the absence of SGs. Meanwhile, PBs can be increased by  
136 arsenite stress in MEF cells expressing non-phosphorylated eIF2 $\alpha$  mutant, which prevents  
137 SG formation (Kedersha et al., 2005). We treated HeLa cell with PP242, an mTOR  
138 inhibitor inhibiting SG assembly (Fournier et al., 2013, Feldman et al., 2009), and found  
139 PBs were increased by arsenite without SG formation (Fig. 3C). This implies that PBs do  
140 not require SGs to form in agreement with previous studies (Kedersha et al., 2005).

141

### 142 **Endogenous PABPC1 can be substituted by over-expressed PABPC1-GFP**

143 We have shown that PB components can be found at PABPC1-rich SG (Fig. 2), and that  
144 only a fraction of the SGs contain PABPC1 in knocked-down cells (Fig. 3). Thus PBs  
145 require PABPC1, but not other SG components, for assembly.

146 It is known that overexpression of PABPC1 down-regulates the endogenous PABPC1  
147 translation and protein abundance through self-regulation (Hornstein et al., 1999b, de  
148 Melo Neto et al., 1995, Wu and Bag, 1998, Hornstein et al., 1999a). This provides an  
149 opportunity to create cells where endogenous PABPC1 is replaced by exogenous  
150 PABPC1-GFP. We took advantage of an antibody (Abcam ab21060) that recognized the  
151 tail region of PABPC1 but not the chimeric PABPC1-GFP protein. Overexpression of  
152 PABPC1-GFP reduced endogenous PABPC1 to a very low level in cells (Fig. s1).  
153 However, the PBs assembled as normal, which implies that the over-expressed PABPC1-

154 GFP can substitute endogenous PABPC1 in maintaining the PB population in unstressed  
155 cells.

156

### 157 **Separate PBs can be induced after SG inhibition**

158 PBs assembly is closely related to PABPC1-containing SGs at low PABPC1 levels. We  
159 then asked whether structures of SG were required or not in such process. With PP242  
160 inhibiting SG assembly, we stressed PABPC1-depleted cells with arsenite and individual  
161 PBs began to form (Fig. 3D). This shows that the low level of PABPC1 dissipated in  
162 cytoplasm can support PB assembly under stresses. It also confirms that SGs are not  
163 required for PB assembly. On the contrary, when the low level of PABPC1 was packed  
164 into SGs, it results in fusion of PBs and SGs. It is likely the tightly packed PABPC1 in  
165 SGs will not easily dissociate for mRNP remodeling, and thus lead to fusion of PBs and  
166 SGs.

167

### 168 **Overexpressed Dcp1a, TNRC6A and DDX6 can induce PB formation in PABPC1-** 169 **depleted cells, and are found associated with the fusions of PBs and SGs**

170 Overexpression of PB proteins can generate PBs that are not functional (Cougot et al.,  
171 2004). In PABPC1-depleted cells, overexpression of Dcp1a or DDX6 could induce PBs  
172 (Fig. 4A). When cells were stressed with arsenite, sorbitol, or heat shock, we found  
173 Dcp1a-GFP or HA-TNRC6A were present in PB/SG fusions (Fig. 4B & C). This  
174 confirms that multiple PB components were assembling at the fusion structures.  
175 Meanwhile, overexpression of Dcp1a or DDX6 could induce PB-like structures in  
176 stressed cells, as observed by other groups. Therefore, depletion of PABPC1 did not  
177 prevent the aggregation of overexpressed PB proteins into granules.

178

### 179 **Creating PB/SG fusions without PABPC1 depletion**

180 We next asked how PABPC1, a protein absent from PBs, could affect their formation.  
181 One hypothesis is that PB assembly may initiate on PABPC1-containing mRNPs. When  
182 the residual PABPC1 after depletion is packed into SGs, PB components are recruited  
183 there and thus a PB/SG fusion emerges. We speculated that certain PB proteins

184 interacting with PABPC1 might mediate the processes. We used a protein engineering  
185 approach to test our hypothesis.

186 GW182 proteins (TNRC6A/B/C in human) interact with PABPC1 through the MLLE  
187 domain and are required for PB assembly (Eulalio et al., 2007b; Liu et al., 2005a). The  
188 native affinity of the GW182 PAM2 motif for MLLE of PABPC1 is about 6  $\mu$ M (Kozlov  
189 et al., 2010, Jinek et al., 2010). We engineered the PAM2 motif in GW182 to increase its  
190 affinity by including features from Paip2 PAM2 motif. The engineered GW182 protein  
191 contained a super-PAM2, binding PABPC1 about 300 times tighter (Fig. 5A, construct  
192 information in Materials and Methods). The super-PAM2 motif could efficiently localize  
193 fused GFP protein to stress granules (Fig. 5B). Introduction of super-PAM2 greatly  
194 increased association of GW182 and endogenous PABPC1 (Fig. 5C). When we stressed  
195 cells overexpressing super-GW182-GFP, the super-GW182 along with other PB  
196 components located to SGs to make PB/SG fusions (Fig. 6). This fusion is the combined  
197 result of the increased affinity PAM2/MLLE interaction and tightly packed PABPC1 at  
198 SG. It indicates that PABPC1 interacting proteins, like GW182, could play an important  
199 role in PB assembly through interaction with PABPC1.

200

### 201 **Ago-binding region of super-GW182 is involved in recruiting other components**

202 Both the N-terminal Ago-binding and mid Q/N region of GW182 were required for PB  
203 localization (Lazzaretti et al., 2009, Behm-Ansmant et al., 2006). We generated deletions  
204 of super-GW182 (TNRC6A) and checked their capability to bring PB/SG components  
205 together. Under arsenite stress, super-GW182 $\Delta$ Q/N could induce fusion of PB/SG (Fig.  
206 7B), while super-GW182 $\Delta$ Ago was less efficient in fusing PB/SG (Fig. 7A). This  
207 suggests that the Ago-binding region is critical in subsequent PB components recruiting  
208 and assembly. This agrees with previous studies that showed that deletion of Q/N region  
209 in TNRC6A affects its PB localization much less than deletion of Ago-binding region  
210 (Lazzaretti et al., 2009). This indicates that the redirection of PB components to SGs by  
211 super-GW182 uses a similar mechanism to TNRC6A assembly into PBs.

212

213

214 **GW182 $\Delta$ PAM2 can aggregate in PABPC1 depleted cells and goes to SGs when**  
215 **stressed**

216 We have shown that super-GW182 mimicked fusion of PB/SGs without depletion of  
217 PABPC1. This led us to ask what if the PAM2/MLLE interaction was missing? We  
218 transfected GW182 $\Delta$ PAM2 ( $\Delta$ T952–Q971) plasmid together with PABPC1 siRNA. HA-  
219 GW182 $\Delta$ PAM2 formed PB-like granules in unstressed cells (Fig. s2A) and could be  
220 found in PB/SG fusions when stressed (Fig. s2B). The tendency of overexpressed PB  
221 proteins to aggregate into granules makes it hard to dissect the role of PAM2/MLLE  
222 interaction here.

223

224 **Discussion**

225 Here, we have shown that PABPC1 protein level is critical to PB assembly. PABPC1 is a  
226 translation initiation factor and plays important role in mRNA metabolism. Depletion of  
227 PABPC1 decreases the number of PBs in unstressed cells. When the PABPC1-depleted  
228 cells are stressed, PB components are recruited to PABPC1-enriched SG. However, if SG  
229 assembly is inhibited, individual PBs can form in stressed cells.

230 PB assembly may initiate on PABPC1-containing mRNPs (Fig. 8). PABPC1 might be  
231 required in mRNP remodeling into P-bodies, thus PABPC1 depletion decreases PB  
232 numbers in unstressed conditions. The requirement of PABPC1 for PB formation drives  
233 PB components to certain SGs, where the residual PABPC1 is enriched after depletion.  
234 The displacement of PABPC1 at SG is difficult so individual PBs fail to form. When SG  
235 is inhibited by PP242, the same residual amount of PABPC1 in cytoplasm can support  
236 normal PB formation. It implies that the ability of PABPC1 to disassociate from mRNPs  
237 is required for formation of individual PBs. However, the mechanisms regarding how and  
238 when PABPC1 disassociates from mRNP are still to be investigated.

239 The displacement of PABPC1 from microscope-visible PBs is a critical step in PB  
240 assembly as was proposed by other colleagues (Chen and Shyu, 2013). PABPC1 plays a  
241 double role regarding poly(A) tail of mRNA. mRNA is stabilized and protected by  
242 PABPC1 from deadenylation by Ccr4/Not deadenylases (Tucker et al., 2002).  
243 Meanwhile, PABPC1 is required for deadenylation by Pan2/Pan3 deadenylases (Lowell  
244 et al., 1992, Zheng et al., 2008). The absence of PABPC1 in PBs is likely due to



245 shortening of poly(A) in remodeling, as suggested by the absence of a signal for poly(A)  
246 RNA in PBs (Cougot et al., 2004).

247 Tendency of PB proteins to aggregate when overexpressed adds to the difficulty of PB  
248 assembly studies. Using super-PAM2 to relocate proteins to SGs is a novel way to  
249 evaluate their roles in PB assembly and dissect specific interactions. In all, we show that  
250 PABPC1 functions in mRNP remodeling and PB formation. Many mechanistic details  
251 need further studying. We look forward to future studies on roles of PABPC1 in mRNA  
252 metabolism.

253

254

## 255 **Materials and methods**

### 256 Plasmids and siRNA

257 pT7-EGFP-C1-HsTNRC6A, pT7-EGFP-C1-HsTNRC6B, pT7-EGFP-C1-HsRCK  
258 (DDX6), pT7-EGFP-C1-HsDcp1a, and pT7-EGFP-C1-HsDCP2 were gifts from Elisa  
259 Izaurralde (Addgene plasmid # 25030, 25031, 25033, 25034, 25035)(Tritschler et al.,  
260 2009). Sequence (agcaatctgaatccaaatgca) encoding amino acids SNLNPNA was inserted  
261 between nucleotides 4827A and 4828C of TNRC6A, or 4431T and 4432C of TNRC6B to  
262 create super-GW182. Reverse-PCR was used for constructing TNRC6A $\Delta$ Ago ( $\Delta$ 7-300)  
263 and TNRC6A $\Delta$ Q/N ( $\Delta$ 360-402). Plasmids expressing HA-MBP, HA-TNRC6A and HA-  
264 TNRC6A $\Delta$ PAM2 were generous gifts from Drs. Eric Huntzinger and Elisa Izaurralde  
265 (Huntzinger et al., 2010). PABPC1 was inserted between BamH I and NotI of pCDNA3-  
266 EGFP. siRNAs were synthesized at Dharmacon. The siRNA sequences used were  
267 siPABPC1 (5'-AAGGUGGUUUGUGAUGAAAAU-3', 5'-  
268 AAUCGCUCCUGAACCAGAAUC-3'), siPaip2 (5'-  
269 GAGUACAUGUGGAUGGAAAUU-3', 5'- UGGAAGAUCUUGUGGUCAAUU-3').  
270 Control siRNA was purchased from Qiagen (SI03650318).

271

### 272 Cell culture and transfections

273 HeLa S3 or MEF cells were cultured in DMEM supplemented with 10% fetal bovine  
274 serum. 10<sup>5</sup> cells were plated per well in 24-well plate the day before transfection. 60-90  
275 pmol siRNA or 0.8  $\mu$ g DNA plasmid was mixed with 2  $\mu$ l Lipofectamine 2000 in Opti-

276 MEM and then added to cells. After 48 hours, cells were trypsin digested and split onto  
277 cover slides. Cells were treated and fixed after 24 hours. For western analysis, cells were  
278 changed into fresh medium for another day and harvested in SDS loading buffer.

279

280 Immunofluorescence and confocal microscopy

281 Cells were fixed with cold methanol (-20°C) for 10 minutes and then treated with 0.1%  
282 Triton X-100 in 1x PBS. Cells were blocked with 5% normal goat serum (Millipore S26)  
283 in PBS. Cells were incubated in 1x PBS, supplemented with anti-PABPC1 (Abcam  
284 ab21060; Santa Cruz sc32318)(1:200), anti-hedls (Santa Cruz sc8418)(1:1000), anti-  
285 Paip2 (Sigma-Aldrich P0087)(1:500), anti-eIF4G1 (Sigma-Aldrich AB-1232)(1:200),  
286 anti-Ataxin-2 (BD Biosciences 611378)(1:200), anti-HA (Covance MMS-101P)(1:200),  
287 anti-Dcp1a (Abcam ab47811)(1:200), anti-DDX6 (Abcam ab40684)(1:200), anti-EDC4  
288 (hedls)(Abcam ab72408)(1:200), anti-Ago1 (Santa Cruz sc53521)(1:200), anti-G3BP  
289 (gift of Dr. Imed Gallouzi)(1:500) or anti-HuR (gift of Dr. Imed Gallouzi)(1:200). Cells  
290 were washed in PBS 3 times, before incubated with corresponding second antibodies  
291 conjugated with Alexa488 or Alexa647 (Sigma-Aldrich A31620, A31628, A31571) or  
292 Dylight550 (Bethyl A120-101D3) or Rhodamine (Millipore 12-509, 12-510) at 1:200 –  
293 1:500 dilutions. DAPI (Roche) was added to washing buffer at 0.5µg/ml to treat cells for  
294 10 minutes. Cover slides were finally mounted in ProLong Gold antifade reagent (Life  
295 technology P36930). Images were collected on Zeiss LSM 310 confocal microscope in  
296 the McGill University Life Sciences Complex Advanced BioImaging Facility (ABIF).  
297 PBs were counted manually in a sample size of 50 cells for each group. Sample deviation  
298 was calculated within group.

299

300 Western blotting

301 Protein samples were heated at 95°C and separated in SDS-PAGE. Proteins were then  
302 transferred to PVDF membrane in Tris/glycine buffer, with 20% methanol in cold room.  
303 PVDF membrane was blocked in 1x TBS (pH 7.5), containing 0.05% Tween-20 and 5%  
304 skim milk powder or bovine serum albumin. Besides antibodies above, anti-GW182  
305 (Novus NBP1-88232)(1:200) and anti-tubulin (Sigma-Aldrich T9028) were also used for  
306 detection of related proteins.

307

#### 308 Immunoprecipitation

309 Cells were lysed in 20 mM Hepes (pH 7.4), 150 mM NaCl, 0.5% NP-40, 2 mM DTT, 2  
310 mM MgCl<sub>2</sub>, 1 mM CaCl<sub>2</sub> and protease inhibitor tablet (Roche), and cleared by  
311 centrifugation. Optimized amount of antibodies were added to cleared lysate for 2 hours.  
312 Dynabeads protein A or protein G were washed and added to lysate for 0.5 hour.  
313 Dynabeads were then washed with 1x PBS and boiled in SDS loading buffer for further  
314 analysis.

315

#### 316 Surface plasmon resonance

317 GST-MLLE protein was applied to Series S sensor chip CM5 bound with anti-GST  
318 antibodies (GE Healthcare BR100223), in Biacore T100. After wash, various  
319 concentrations of super-PAM2 (SNLNPNAPEFHPGVPWKGLQ) or super-PAM2-  
320 Phe10Ala (SNLNPNAPEAHPGVPWKGLQ) were added to bind GST-MLLE captured  
321 on chip. The corresponding steady states measured in relative units (RU) were plotted  
322 versus concentrations of peptides in the flow system to estimate dissociate constants.

323

#### 324 **Acknowledgements**

325 We acknowledge Drs. Elisa Izaurrealde, Witold Filipowicz and Imed Gallouzi for  
326 generously sharing plasmids or antibodies. We are grateful for suggestions and help from  
327 colleagues during the project.

328

#### 329 **Competing interests**

330 No competing interests declared.

331

#### 332 **Author contributions**

333 J.X. designed the experiments. Y.C. and X.W. assisted J.X. in carrying out the  
334 experiments. G.K. designed the super-PAM2 sequence. J.X. and K.G. prepared the  
335 manuscript.

336

#### 337 **Funding**

338 This study was supported by Canadian Institutes of Health Research grant MOP-14219.

339

340

341

342

343

344

## 345 **References**

- 346 ANDERSON, P. & KEDERSHA, N. 2006. RNA granules. *J Cell Biol*, 172, 803-8.
- 347 ANDREI, M. A., INGELFINGER, D., HEINTZMANN, R., ACHSEL, T., RIVERA-  
348 POMAR, R. & LUHRMANN, R. 2005. A role for eIF4E and eIF4E-transporter in  
349 targeting mRNPs to mammalian processing bodies. *RNA*, 11, 717-27.
- 350 AYACHE, J., BENARD, M., ERNOULT-LANGE, M., MINSHALL, N., STANDART,  
351 N., KRESS, M. & WEIL, D. 2015. P-body assembly requires DDX6 repression  
352 complexes rather than decay or Ataxin2/2L complexes. *Mol Biol Cell*, 26, 2579-  
353 95.
- 354 BAER, B. W. & KORNBERG, R. D. 1983. The protein responsible for the repeating  
355 structure of cytoplasmic poly(A)-ribonucleoprotein. *J Cell Biol*, 96, 717-21.
- 356 BEHM-ANSMANT, I., REHWINKEL, J., DOERKS, T., STARK, A., BORK, P. &  
357 IZAURRALDE, E. 2006. mRNA degradation by miRNAs and GW182 requires  
358 both CCR4:NOT deadenylase and DCP1:DCP2 decapping complexes. *Genes*  
359 *Dev*, 20, 1885-98.
- 360 CHANG, H., LIM, J., HA, M. & KIM, V. N. 2014. TAIL-seq: genome-wide  
361 determination of poly(A) tail length and 3' end modifications. *Mol Cell*, 53, 1044-  
362 52.
- 363 CHEN, C. Y. & SHYU, A. B. 2013. Deadenylation and p-bodies. *Adv Exp Med Biol*,  
364 768, 183-95.
- 365 COUGOT, N., BABAJKO, S. & SERAPHIN, B. 2004. Cytoplasmic foci are sites of  
366 mRNA decay in human cells. *J Cell Biol*, 165, 31-40.
- 367 DE MELO NETO, O. P., STANDART, N. & MARTINS DE SA, C. 1995.  
368 Autoregulation of poly(A)-binding protein synthesis in vitro. *Nucleic Acids Res*,  
369 23, 2198-205.
- 370 DECKER, C. J. & PARKER, R. 2012. P-bodies and stress granules: possible roles in the  
371 control of translation and mRNA degradation. *Cold Spring Harb Perspect Biol*, 4,  
372 a012286.
- 373 DECKER, C. J., TEIXEIRA, D. & PARKER, R. 2007. Edc3p and a  
374 glutamine/asparagine-rich domain of Lsm4p function in processing body  
375 assembly in *Saccharomyces cerevisiae*. *J Cell Biol*, 179, 437-49.
- 376 DEO, R. C., BONANNO, J. B., SONENBERG, N. & BURLEY, S. K. 1999. Recognition  
377 of polyadenylate RNA by the poly(A)-binding protein. *Cell*, 98, 835-45.
- 378 EULALIO, A., BEHM-ANSMANT, I. & IZAURRALDE, E. 2007a. P bodies: at the  
379 crossroads of post-transcriptional pathways. *Nat Rev Mol Cell Biol*, 8, 9-22.

- 380 EULALIO, A., BEHM-ANSMANT, I., SCHWEIZER, D. & IZAURRALDE, E. 2007b.  
381 P-body formation is a consequence, not the cause, of RNA-mediated gene  
382 silencing. *Mol Cell Biol*, 27, 3970-81.
- 383 FELDMAN, M. E., APSEL, B., UOTILA, A., LOEWITH, R., KNIGHT, Z. A.,  
384 RUGGERO, D. & SHOKAT, K. M. 2009. Active-site inhibitors of mTOR target  
385 rapamycin-resistant outputs of mTORC1 and mTORC2. *PLoS Biol*, 7, e38.
- 386 FOURNIER, M. J., COUDERT, L., MELLAOUI, S., ADJIBADE, P., GAREAU, C.,  
387 COTE, M. F., SONENBERG, N., GAUDREAU, R. C. & MAZROUI, R.  
388 2013. Inactivation of the mTORC1-eukaryotic translation initiation factor 4E  
389 pathway alters stress granule formation. *Mol Cell Biol*, 33, 2285-301.
- 390 HORNSTEIN, E., GIT, A., BRAUNSTEIN, I., AVNI, D. & MEYUHAS, O. 1999a. The  
391 expression of poly(A)-binding protein gene is translationally regulated in a  
392 growth-dependent fashion through a 5'-terminal oligopyrimidine tract motif. *J*  
393 *Biol Chem*, 274, 1708-14.
- 394 HORNSTEIN, E., HAREL, H., LEVY, G. & MEYUHAS, O. 1999b. Overexpression of  
395 poly(A)-binding protein down-regulates the translation or the abundance of its  
396 own mRNA. *FEBS Lett*, 457, 209-13.
- 397 HUNTZINGER, E., BRAUN, J. E., HEIMSTADT, S., ZEKRI, L. & IZAURRALDE, E.  
398 2010. Two PABPC1-binding sites in GW182 proteins promote miRNA-mediated  
399 gene silencing. *EMBO J*, 29, 4146-60.
- 400 IMATAKA, H., GRADI, A. & SONENBERG, N. 1998. A newly identified N-terminal  
401 amino acid sequence of human eIF4G binds poly(A)-binding protein and  
402 functions in poly(A)-dependent translation. *EMBO J*, 17, 7480-9.
- 403 JINEK, M., FABIAN, M. R., COYLE, S. M., SONENBERG, N. & DOUDNA, J. A.  
404 2010. Structural insights into the human GW182-PABC interaction in microRNA-  
405 mediated deadenylation. *Nat Struct Mol Biol*, 17, 238-40.
- 406 KAHVEJIAN, A., SVITKIN, Y. V., SUKARIEH, R., M'BOUTCHOU, M. N. &  
407 SONENBERG, N. 2005. Mammalian poly(A)-binding protein is a eukaryotic  
408 translation initiation factor, which acts via multiple mechanisms. *Genes Dev*, 19,  
409 104-13.
- 410 KATO, M., HAN, T. W., XIE, S., SHI, K., DU, X., WU, L. C., MIRZAEI, H.,  
411 GOLDSMITH, E. J., LONGGOOD, J., PEI, J., GRISHIN, N. V., FRANTZ, D.  
412 E., SCHNEIDER, J. W., CHEN, S., LI, L., SAWAYA, M. R., EISENBERG, D.,  
413 TYCKO, R. & MCKNIGHT, S. L. 2012. Cell-free formation of RNA granules:  
414 low complexity sequence domains form dynamic fibers within hydrogels. *Cell*,  
415 149, 753-67.
- 416 KEDERSHA, N., STOECKLIN, G., AYODELE, M., YACONO, P., LYKKE-  
417 ANDERSEN, J., FRITZLER, M. J., SCHEUNER, D., KAUFMAN, R. J.,  
418 GOLAN, D. E. & ANDERSON, P. 2005. Stress granules and processing bodies  
419 are dynamically linked sites of mRNP remodeling. *J Cell Biol*, 169, 871-84.
- 420 KOZLOV, G., SAFAEE, N., ROSENAUER, A. & GEHRING, K. 2010. Structural basis  
421 of binding of P-body-associated proteins GW182 and ataxin-2 by the Mle  
422 domain of poly(A)-binding protein. *J Biol Chem*, 285, 13599-606.
- 423 LAZZARETTI, D., TOURNIER, I. & IZAURRALDE, E. 2009. The C-terminal domains  
424 of human TNRC6A, TNRC6B, and TNRC6C silence bound transcripts  
425 independently of Argonaute proteins. *RNA*, 15, 1059-66.

- 426 LIU, J., RIVAS, F. V., WOHLSCHLEGEL, J., YATES, J. R., 3RD, PARKER, R. &  
427 HANNON, G. J. 2005a. A role for the P-body component GW182 in microRNA  
428 function. *Nat Cell Biol*, 7, 1261-6.
- 429 LIU, J., VALENCIA-SANCHEZ, M. A., HANNON, G. J. & PARKER, R. 2005b.  
430 MicroRNA-dependent localization of targeted mRNAs to mammalian P-bodies.  
431 *Nat Cell Biol*, 7, 719-23.
- 432 LOWELL, J. E., RUDNER, D. Z. & SACHS, A. B. 1992. 3'-UTR-dependent  
433 deadenylation by the yeast poly(A) nuclease. *Genes Dev*, 6, 2088-99.
- 434 MOKAS, S., MILLS, J. R., GARREAU, C., FOURNIER, M. J., ROBERT, F., ARYA,  
435 P., KAUFMAN, R. J., PELLETIER, J. & MAZROUI, R. 2009. Uncoupling stress  
436 granule assembly and translation initiation inhibition. *Mol Biol Cell*, 20, 2673-83.
- 437 MOLLET, S., COUGOT, N., WILCZYNSKA, A., DAUTRY, F., KRESS, M.,  
438 BERTRAND, E. & WEIL, D. 2008. Translationally repressed mRNA transiently  
439 cycles through stress granules during stress. *Mol Biol Cell*, 19, 4469-79.
- 440 MORETTI, F., KAISER, C., ZDANOWICZ-SPECHT, A. & HENTZE, M. W. 2012.  
441 PABP and the poly(A) tail augment microRNA repression by facilitated miRISC  
442 binding. *Nat Struct Mol Biol*, 19, 603-8.
- 443 REIJNS, M. A., ALEXANDER, R. D., SPILLER, M. P. & BEGGS, J. D. 2008. A role  
444 for Q/N-rich aggregation-prone regions in P-body localization. *J Cell Sci*, 121,  
445 2463-72.
- 446 SAFAEE, N., KOZLOV, G., NORONHA, A. M., XIE, J., WILDS, C. J. & GEHRING,  
447 K. 2012. Interdomain allostery promotes assembly of the poly(A) mRNA  
448 complex with PABP and eIF4G. *Mol Cell*, 48, 375-86.
- 449 SERMAN, A., LE ROY, F., AIGUEPERSE, C., KRESS, M., DAUTRY, F. & WEIL, D.  
450 2007. GW body disassembly triggered by siRNAs independently of their  
451 silencing activity. *Nucleic Acids Res*, 35, 4715-27.
- 452 SOUQUERE, S., MOLLET, S., KRESS, M., DAUTRY, F., PIERRON, G. & WEIL, D.  
453 2009. Unravelling the ultrastructure of stress granules and associated P-bodies in  
454 human cells. *J Cell Sci*, 122, 3619-26.
- 455 STOECKLIN, G. & KEDERSHA, N. 2013. Relationship of GW/P-bodies with stress  
456 granules. *Adv Exp Med Biol*, 768, 197-211.
- 457 SUBTELNY, A. O., EICHHORN, S. W., CHEN, G. R., SIVE, H. & BARTEL, D. P.  
458 2014. Poly(A)-tail profiling reveals an embryonic switch in translational control.  
459 *Nature*, 508, 66-71.
- 460 TEIXEIRA, D., SHETH, U., VALENCIA-SANCHEZ, M. A., BRENGUES, M. &  
461 PARKER, R. 2005. Processing bodies require RNA for assembly and contain  
462 nontranslating mRNAs. *RNA*, 11, 371-82.
- 463 TRITSCHLER, F., BRAUN, J. E., MOTZ, C., IGREJA, C., HAAS, G., TRUFFAULT,  
464 V., IZAURRALDE, E. & WEICHENRIEDER, O. 2009. DCP1 forms asymmetric  
465 trimers to assemble into active mRNA decapping complexes in metazoa. *Proc*  
466 *Natl Acad Sci U S A*, 106, 21591-6.
- 467 TUCKER, M., STAPLES, R. R., VALENCIA-SANCHEZ, M. A., MUHLRAD, D. &  
468 PARKER, R. 2002. Ccr4p is the catalytic subunit of a Ccr4p/Pop2p/Notp mRNA  
469 deadenylase complex in *Saccharomyces cerevisiae*. *EMBO J*, 21, 1427-36.

- 470 WU, J. & BAG, J. 1998. Negative control of the poly(A)-binding protein mRNA  
471 translation is mediated by the adenine-rich region of its 5'-untranslated region. *J*  
472 *Biol Chem*, 273, 34535-42.
- 473 XIE, J., KOZLOV, G. & GEHRING, K. 2014. The "tale" of poly(A) binding protein: The  
474 MLE domain and PAM2-containing proteins. *Biochim Biophys Acta*.
- 475 YOSHIDA, M., YOSHIDA, K., KOZLOV, G., LIM, N., DE CRESCENZO, G., PANG,  
476 Z., BERLANGA, J., KAHVEJIAN, A., GEHRING, K., WING, S. &  
477 SONENBERG, N. 2006. Poly(A) binding protein (PABP) homeostasis is  
478 mediated by the stability of its inhibitor, Paip2. *The EMBO journal*, 25, 1934-  
479 1944.
- 480 YU, J. H., YANG, W. H., GULICK, T., BLOCH, K. D. & BLOCH, D. B. 2005. Ge-1 is a  
481 central component of the mammalian cytoplasmic mRNA processing body. *RNA*,  
482 11, 1795-802.
- 483 ZEKRI, L., KUZUOGLU-OZTURK, D. & IZAURRALDE, E. 2013. GW182 proteins  
484 cause PABP dissociation from silenced miRNA targets in the absence of  
485 deadenylation. *EMBO J*, 32, 1052-65.
- 486 ZHENG, D., EZZEDDINE, N., CHEN, C. Y., ZHU, W., HE, X. & SHYU, A. B. 2008.  
487 Deadenylation is prerequisite for P-body formation and mRNA decay in  
488 mammalian cells. *The Journal of cell biology*, 182, 89-101.
- 489

490

491

492

### 493 **Figure legends**

494

495 Figure 1. PB number and protein levels after PABPC1 or Paip2 depletion. (A-B) HeLa  
496 cells transfected with scramble siRNA were mixed with siPaip2 or siPABPC1 treated  
497 cells, to highlight knockdown effects and compare cells in the same environment.  
498 Staining of PABPC1 or Paip2 (*green*) indicated knockdown effects in cells. PB number  
499 was monitored by hedls (*red*). Visible P-bodies of 50 cells were counted manually and  
500 sample deviation was calculated. The PB number in siPABP cells was significantly lower  
501 at 0.01 significance level using two-tailed t-test for two samples with unequal variance.  
502 (C) Levels of PABPC1, Paip2, hedls, DDX6, Dcp1a, G3BP, GW182 and tubulin 72  
503 hours after siRNA knockdown. The Paip2 antibody recognized both Paip2a and Paip2b.

504

505 Figure 2. Relocalization of hedls or Dcp1a to stress granules in PABPC1-depleted cells.

506 (A-B) HeLa cells were treated with 0.5 mM sodium arsenite for 0.5 hour before fixation.

507 The PB components *hedls (red)* formed loose and irregular granules, colocalized to stress  
508 granules (*green*).

509

510 Figure 3. (A-B) Stress granule assembly is not affected by PABPC1 depletion. PABPC1  
511 depleted cells (Red) displayed similar stress granule pattern to control cells, stained by  
512 anti-G3BP or anti-HuR (*green*). (C) P-bodies form independent of stress granules. HeLa  
513 cells treated by PP242 overnight failed to form stress granules (*red*), but had normal PBs  
514 present. (D) Separate PBs can be induced after SG inhibition in depletion of PABPC1.  
515 HeLa cells were treated with 10 $\mu$ M PP242 for overnight before stressed in 0.5 mM  
516 sodium arsenite for 0.5 hour. Individual PBs (*green*) formed in PABPC1 depleted cells  
517 (*red*).

518

519 Figure 4. P-bodies can be induced in PABPC1 depleted cells. (A) Dcp1a or DDX6  
520 overexpression (*green*) could induce P-body like granules in cells with low PABPC1  
521 (*red*). (B-C) Dcp1a or TNRC6A (*green*) were partly localized to stress granules in  
522 arsenite stressed PABPC1 depleted cells. HeLa cells were transfected with siRNA and  
523 related plasmids simultaneously.

524

525 Figure 5. Engineering of super-GW182 to interact with PABPC1. (A) Super-PAM2  
526 integrated sequences of Paip2-PAM2 and GW182-PAM2 to bind an extended surface on  
527 MLLE domain (PDB: 3KUS and 3KTP). Super-PAM2 bound MLLE of PABPC1 at  
528 around 20 nM measured by surface plasmon resonance using Biacore T100. The  
529 Phe10Ala mutant was not binding MLLE and used as control. (B) Overexpressed super-  
530 PAM2-GFP (*green*) localized to PABP or G3BP (*red*) marked stress granules upon  
531 sodium arsenite treatment. (C) HA-tagged MBP, GW182 (TNRC6A), GW182 $\Delta$ PAM2 or  
532 super-GW182 were transfected in HeLa cells. Immunoprecipitation with anti-HA  
533 antibodies showed stronger interaction of super-GW182 with endogenous PABPC1. The  
534 weak association of natural GW182 and PABPC1 was not shown due to harsh washings.

535



536 Figure 6. Simulation of P-body/Stress granule fusion using super-GW182. HeLa cells  
537 overexpressing super-GW182-GFP (*green*) were stressed by sodium arsenite and stained  
538 with anti-hedls (*cyan*) for P-bodies and anti-PABPC1 (*red*) for stress granules.

539

540 Figure 7. Ago-binding region of GW182 (TNRC6A) is important for recruitment of PB  
541 components. (A-B) Super-GW182 $\Delta$ Ago or super-GW182 $\Delta$ Q/N (*green*) was co-  
542 transfected with siPABPC1. PBs were labeled by anti-hedls (*cyan*) and stress granules  
543 were by anti-PABPC1 (*red*). Super-GW182 $\Delta$ Ago was less efficient in redirecting PB  
544 components to SGs (A) compared with super-GW182 $\Delta$ Q/N (B).

545

546 Figure 8. P-body formation on mRNPs or stress granules. PB assembly may initiate on  
547 PABPC1-containing mRNPs. The requirement of PABPC1 in PB formation drives PB  
548 components to stress granules, where the residual PABPC1 is enriched after depletion.  
549 However, the displacement of PABPC1 is difficult in SG and then individual PBs fail to  
550 form.

551

552

553

554

555

556

A

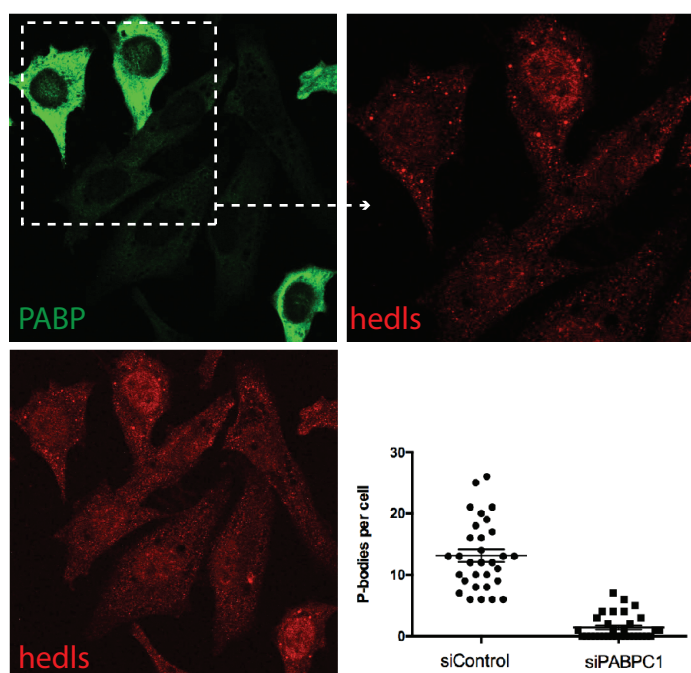

B

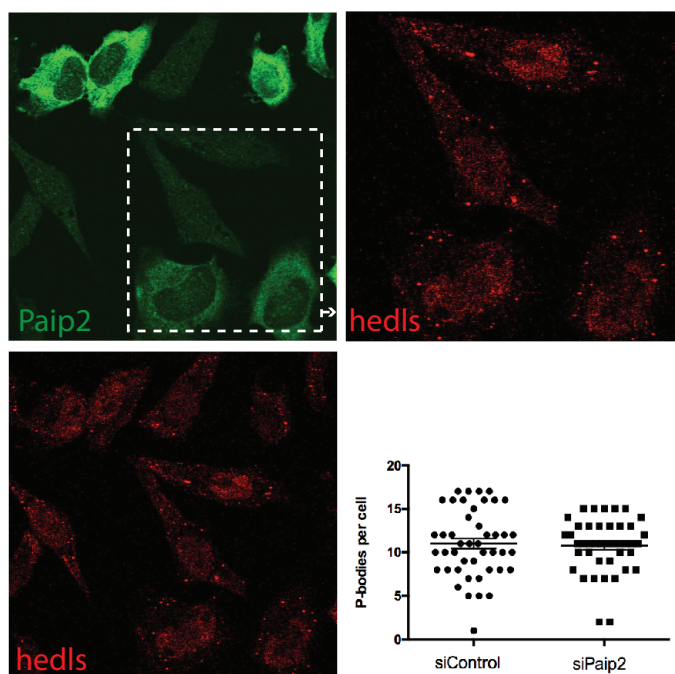

C

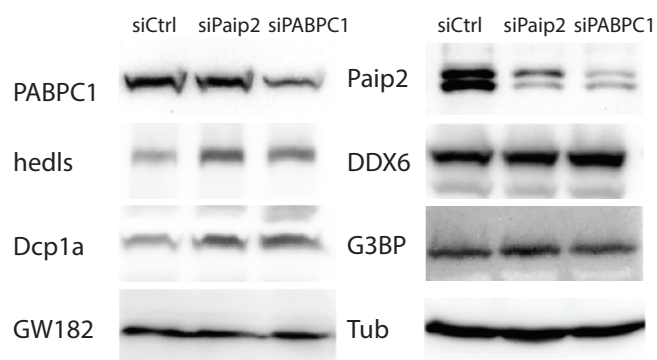

Figure 2

A

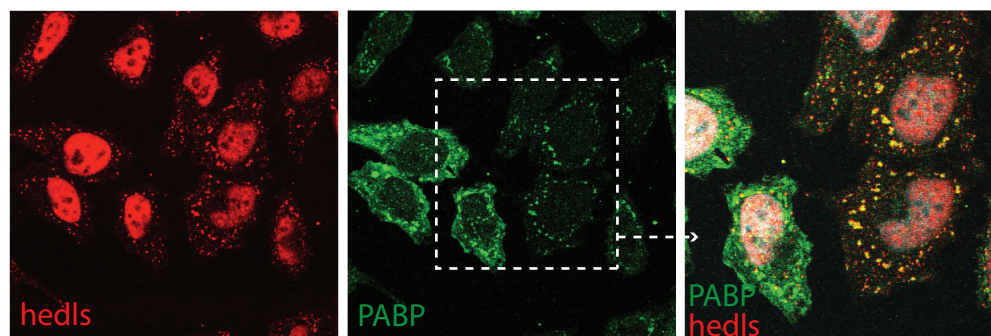

B

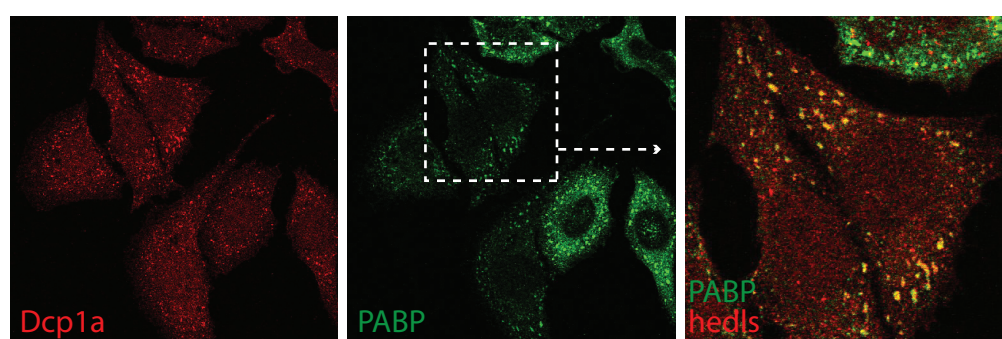

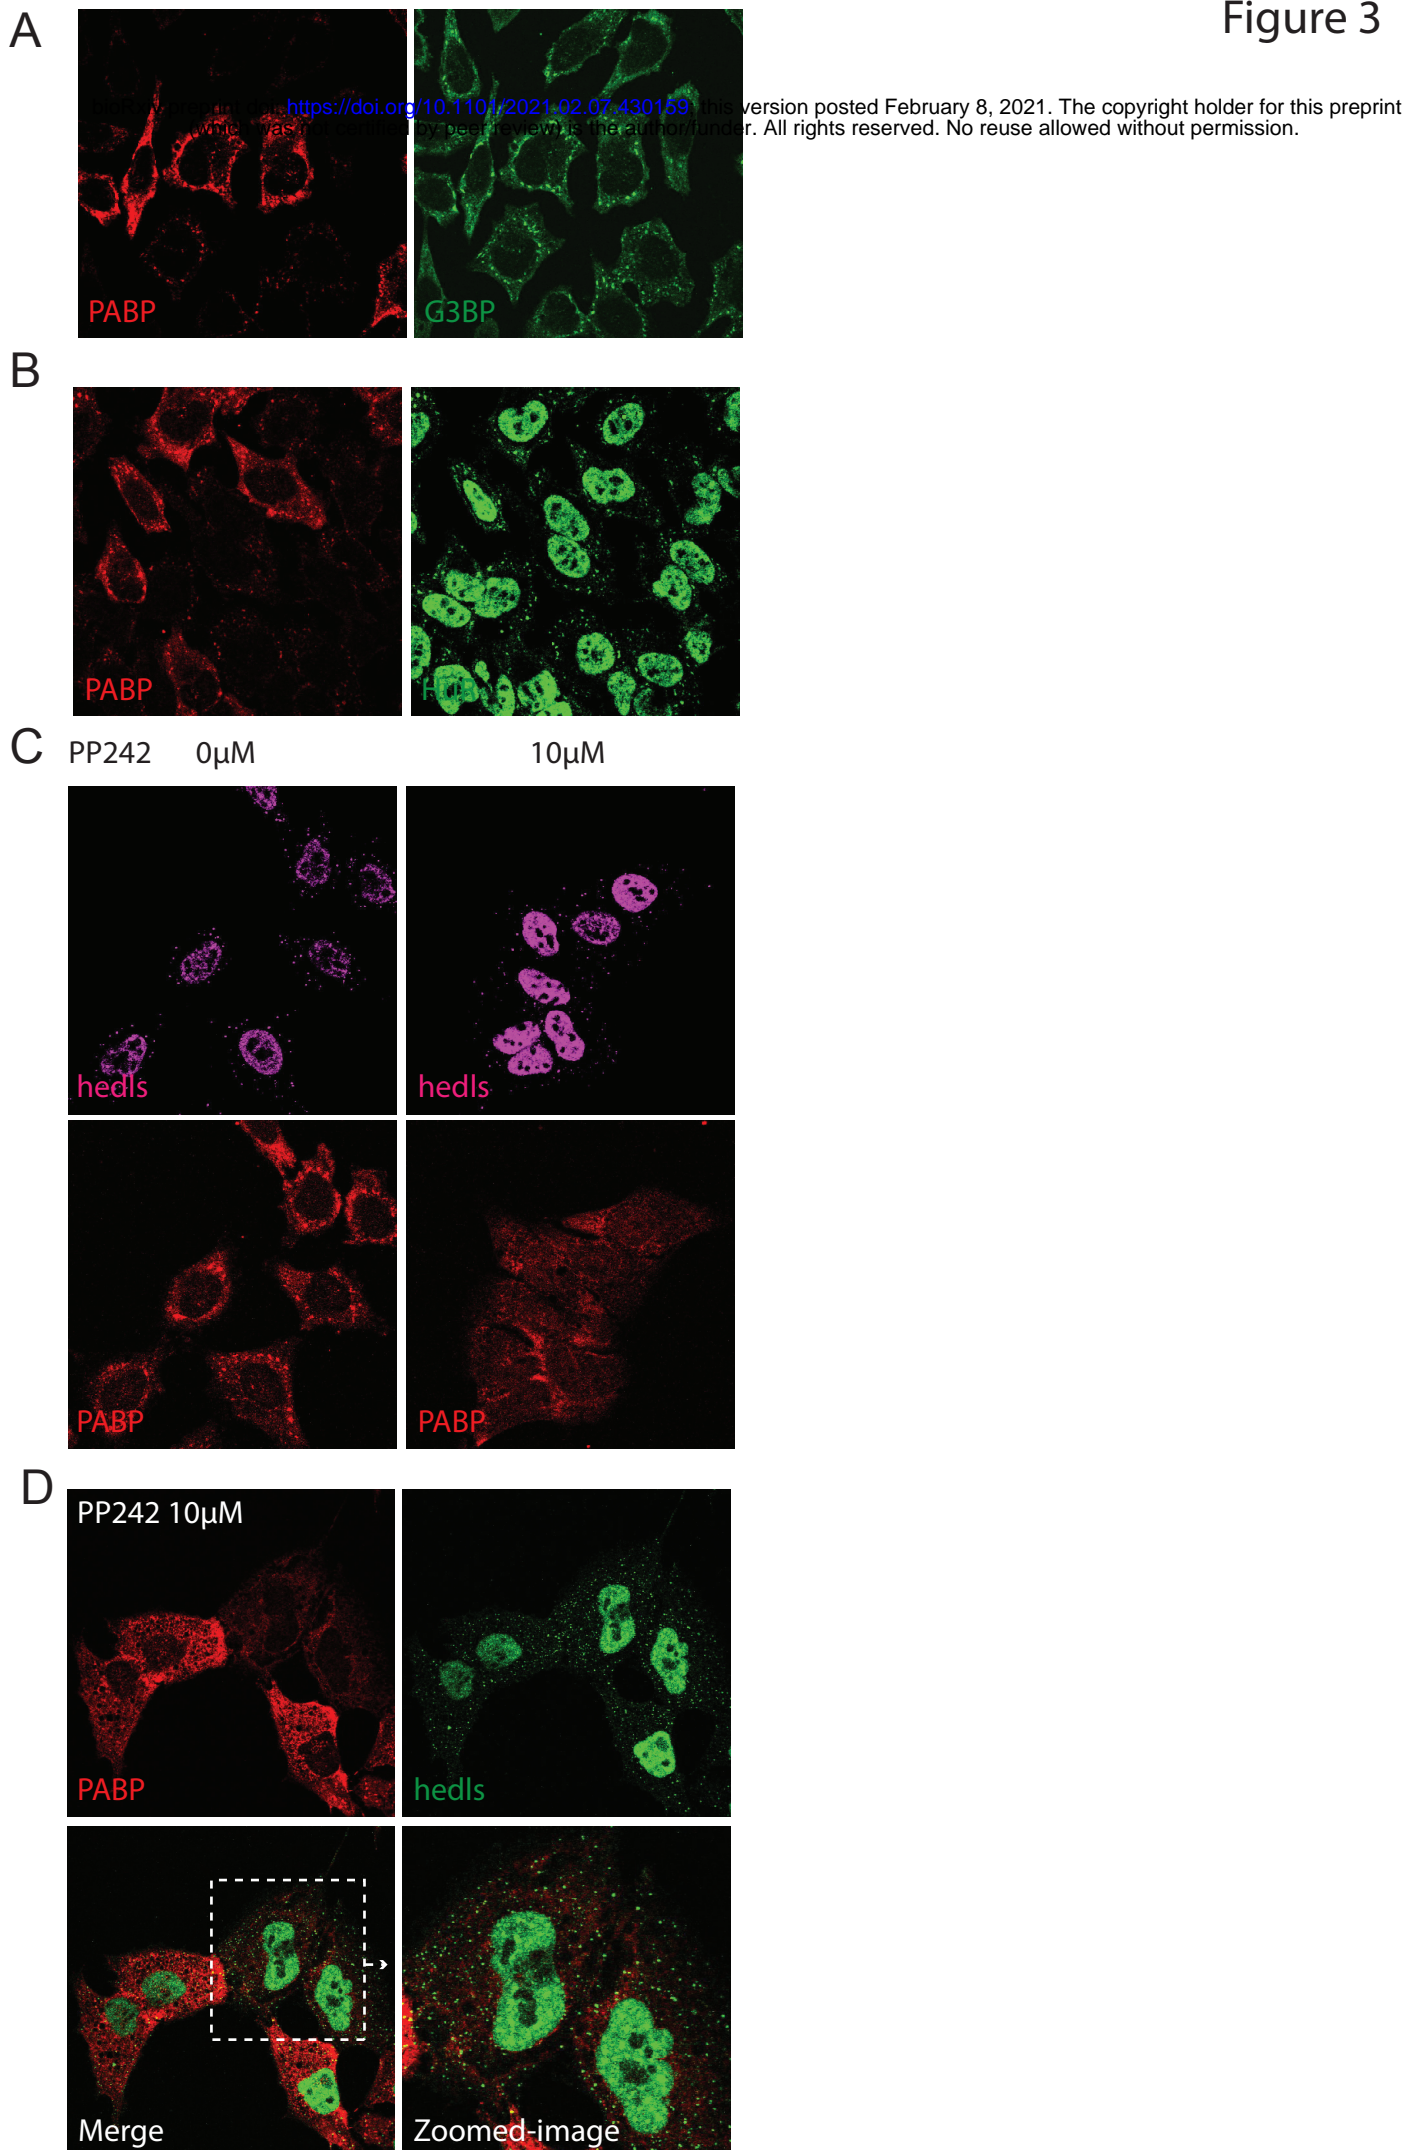

A

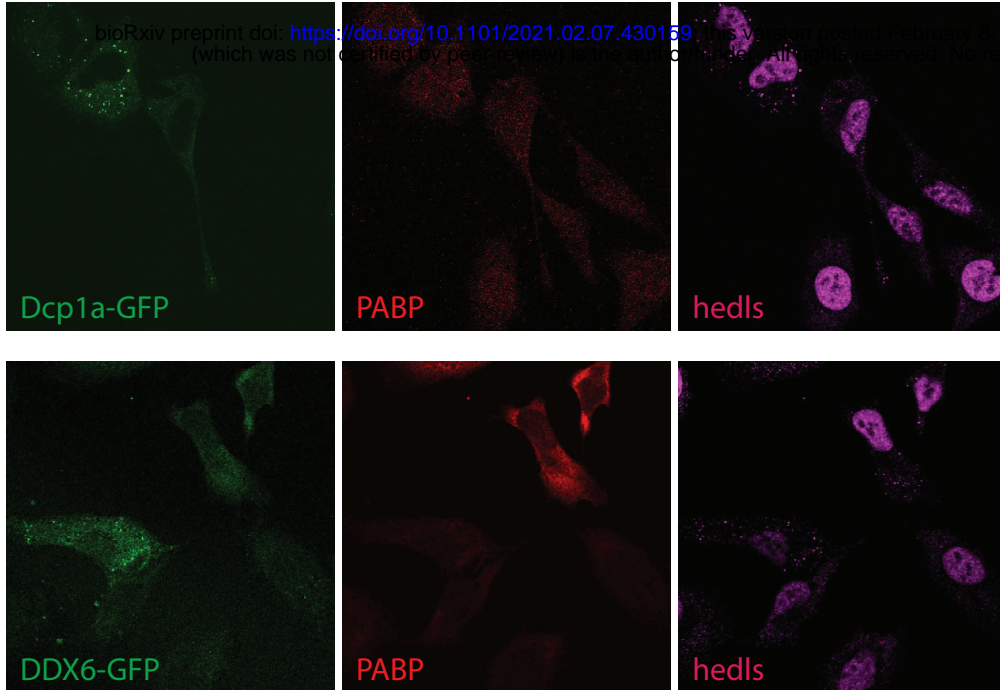

B

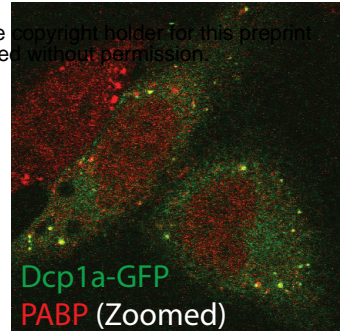

C

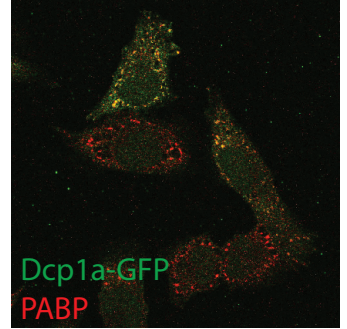

A

bioRxiv preprint doi: <https://doi.org/10.1101/2021.02.07.430159>; this version posted February 8, 2021. The copyright holder for this preprint (which was not certified by peer review) is the author/funder. All rights reserved. No reuse allowed without permission.

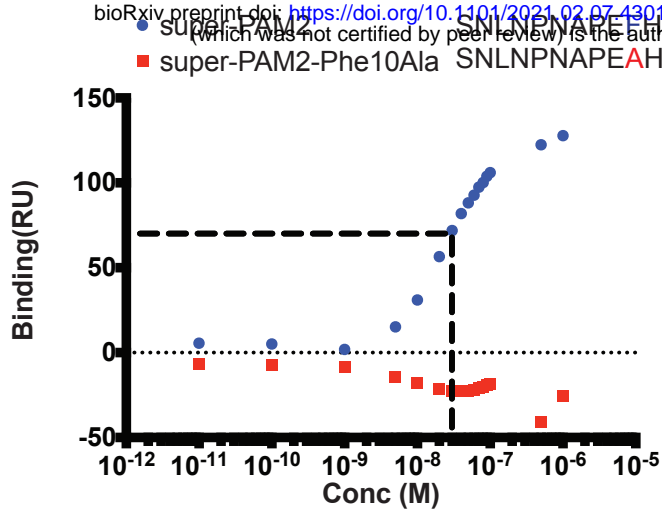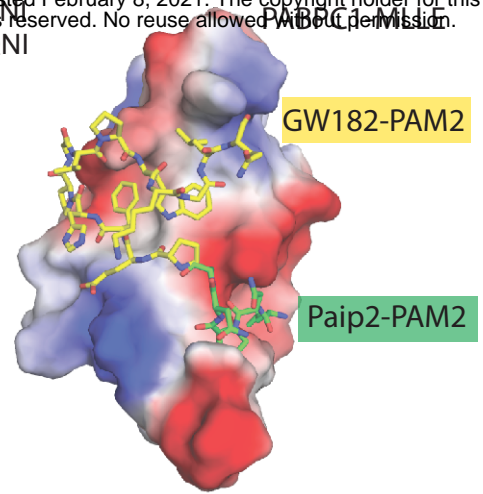

B

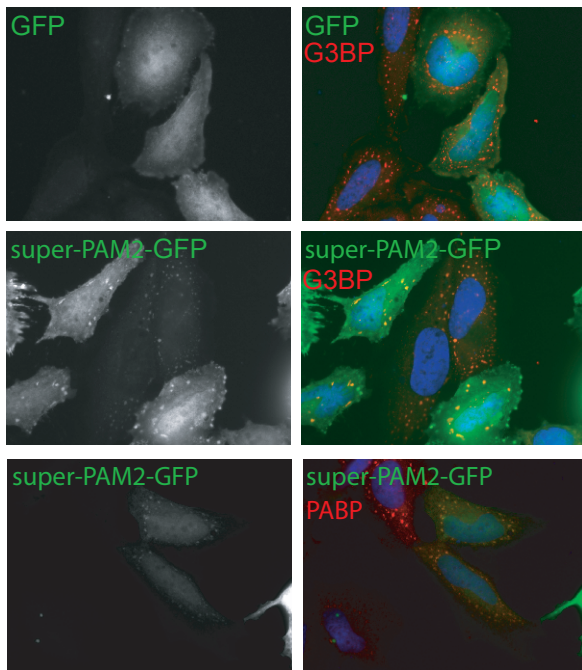

C

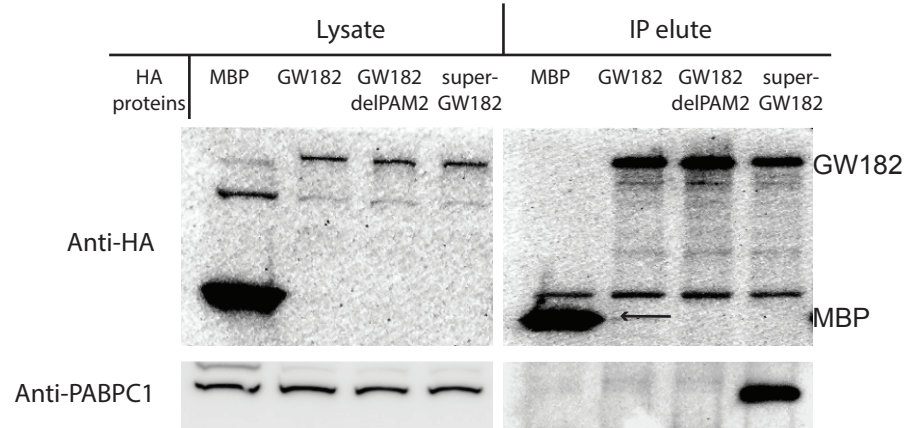

bioRxiv preprint doi: <https://doi.org/10.1101/2021.02.07.430159>; this version posted February 8, 2021. The copyright holder for this preprint (which was not certified by peer review) is the author/funder. All rights reserved. No reuse allowed without permission.

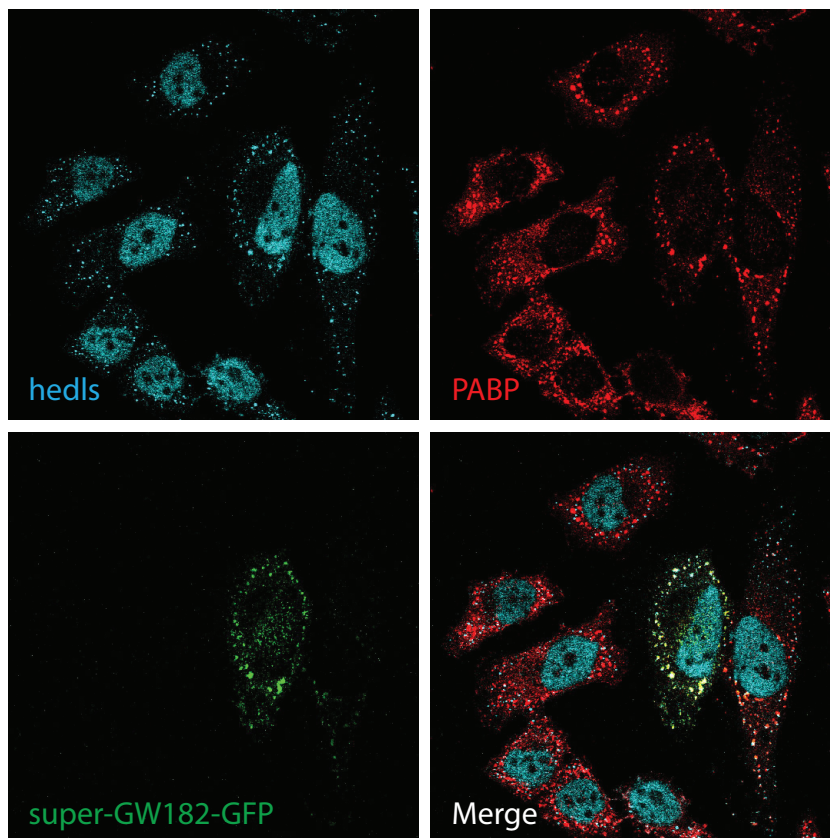

A

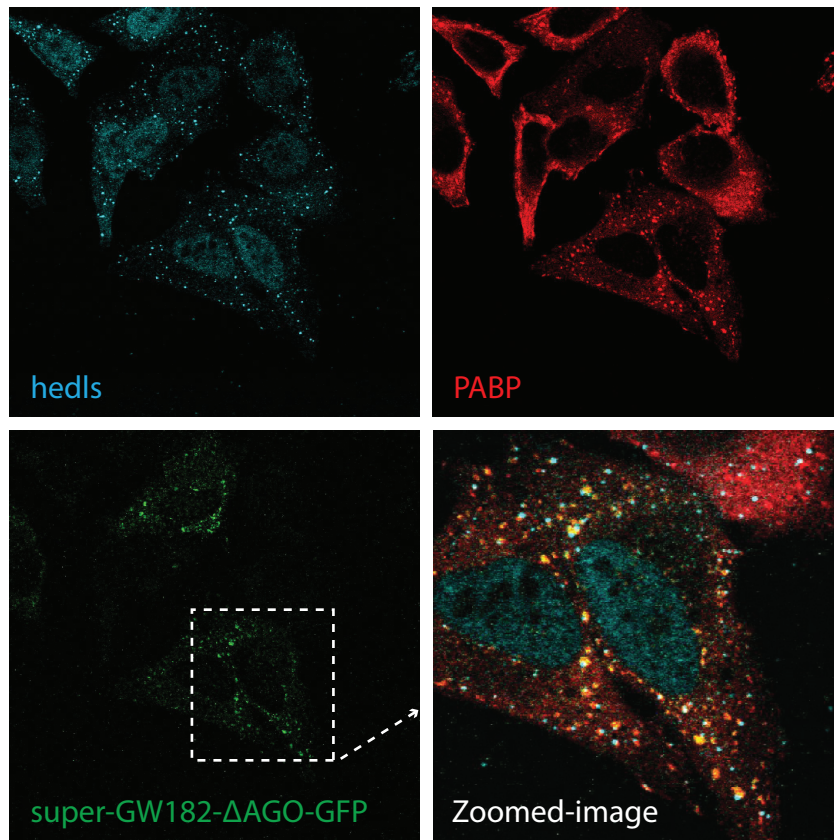

B

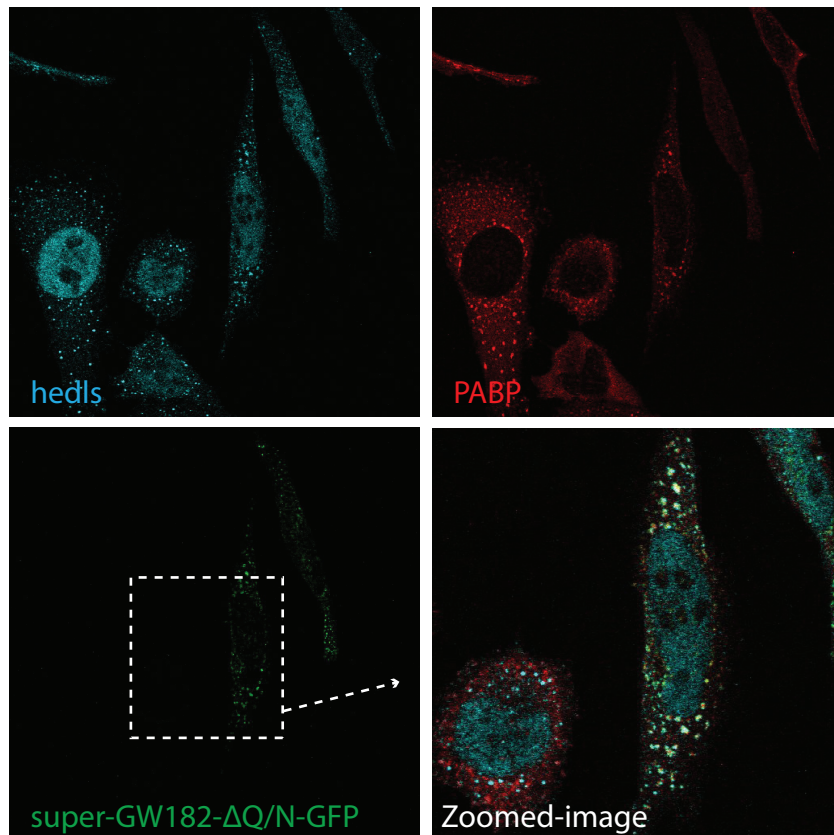



Figure 8

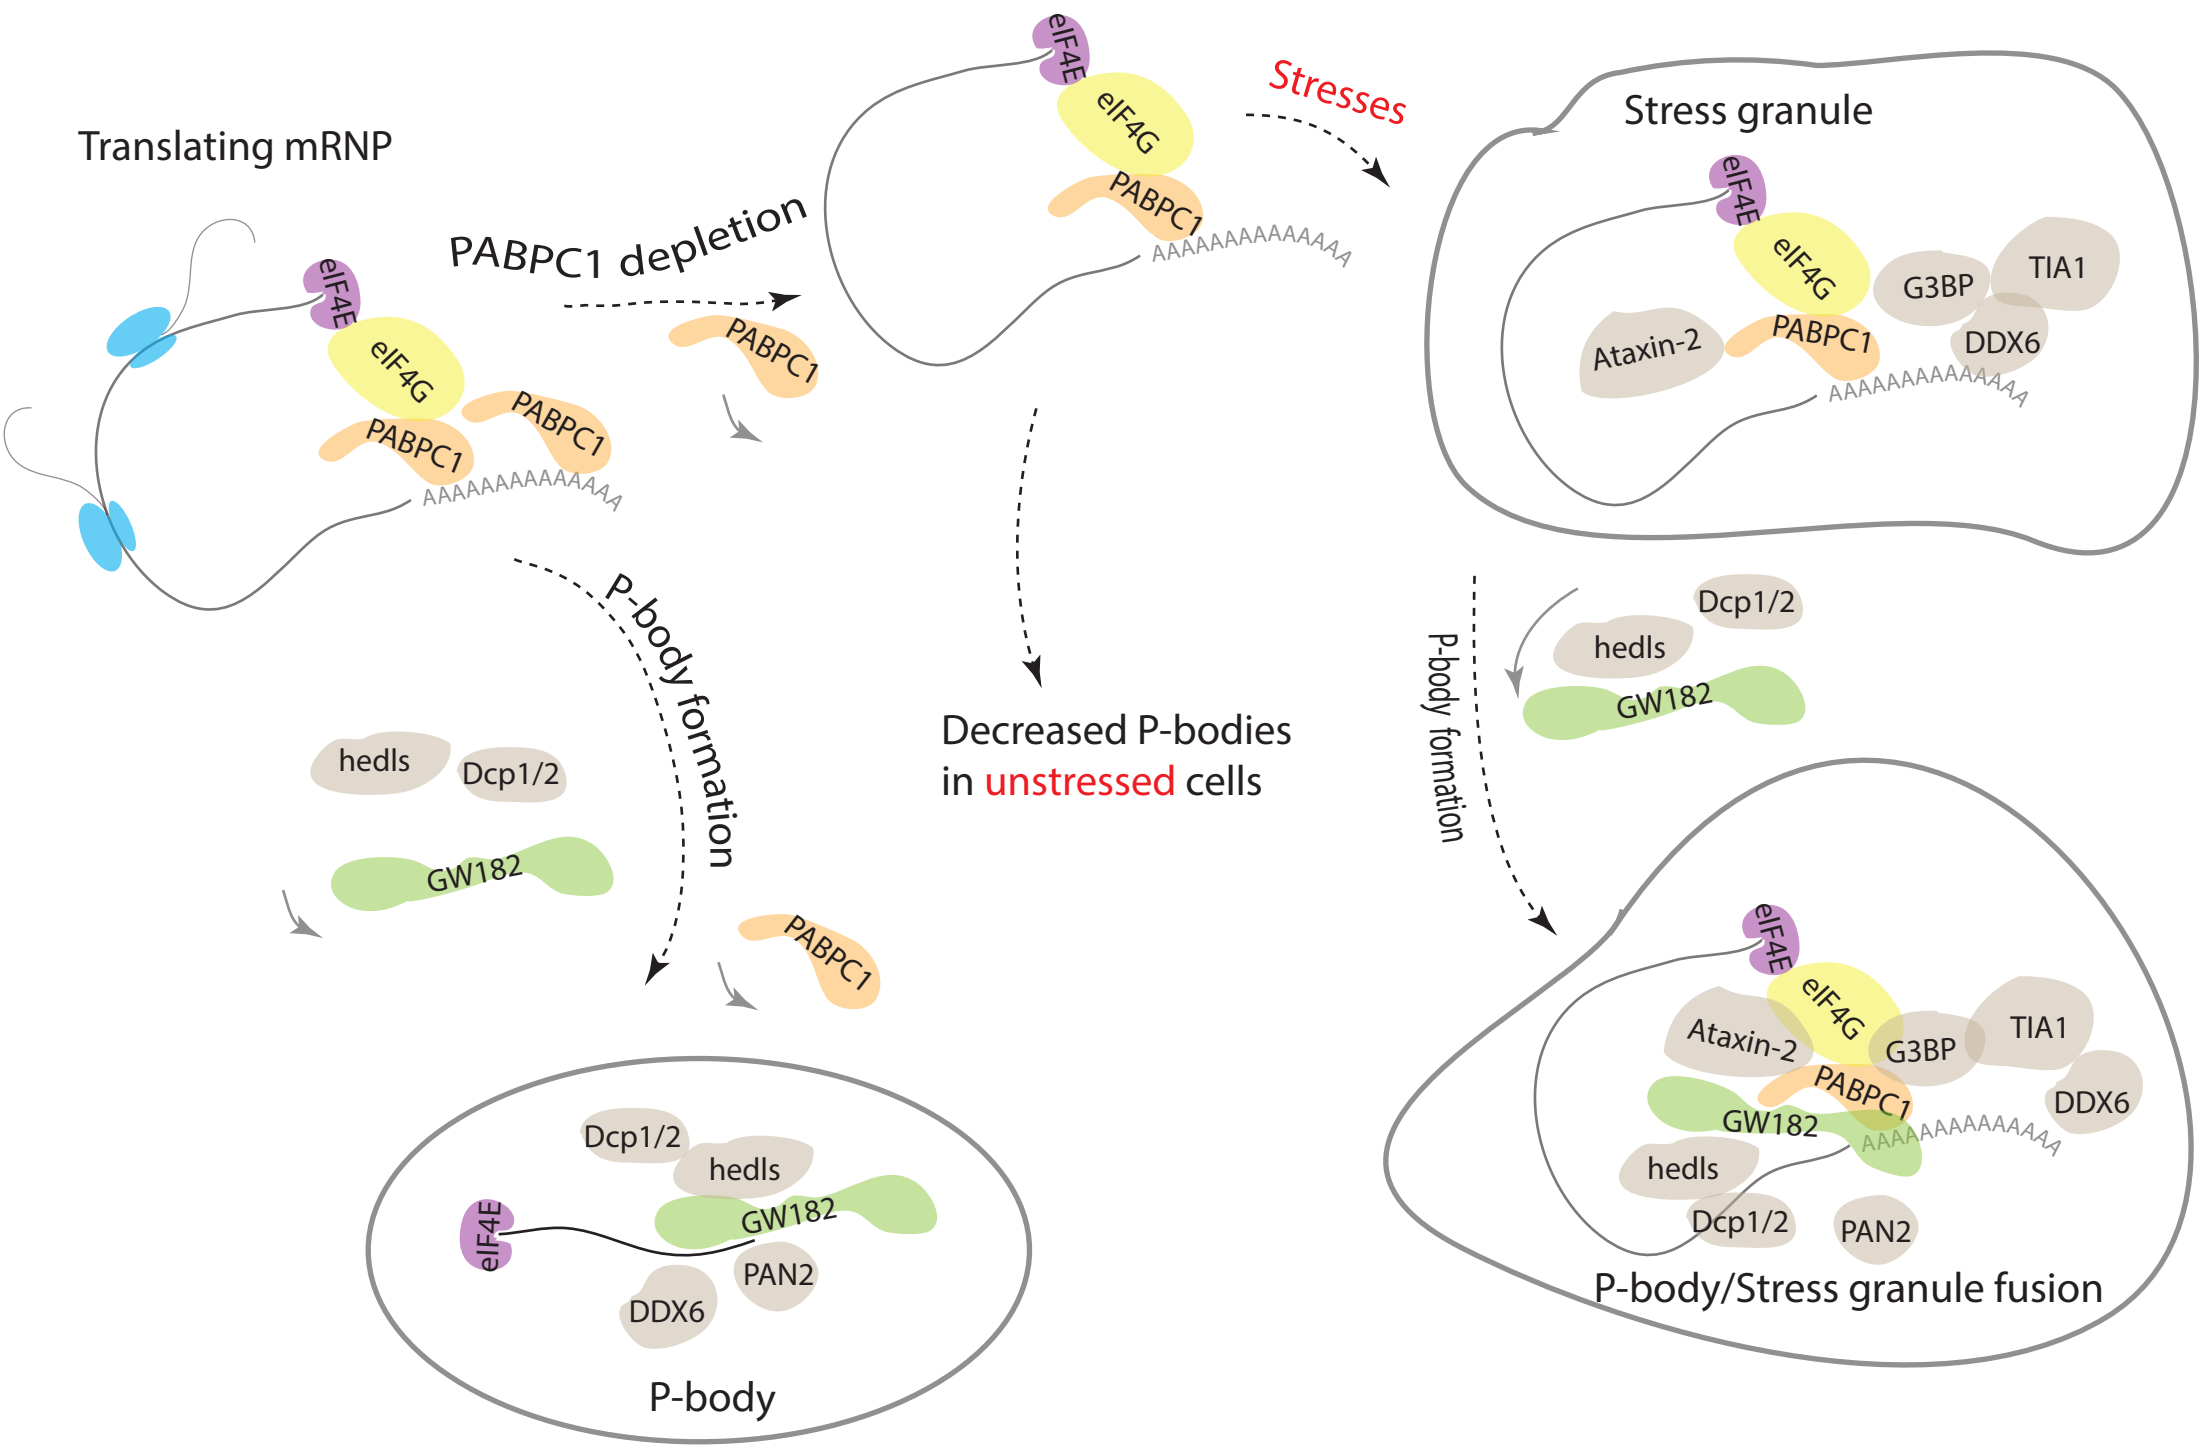

Source: https://biorxiv.org/content/10.1101/2021.02.07.430159v1.full.pdf
